# Supplementary material for: ARL3 is downregulated and acts as a prognostic biomarker in glioma
Source: J Transl Med. 2019 Jun 24;17:210. doi: 10.1186/s12967-019-1914-3 (PMC6591946; doi:10.1186/s12967-019-1914-3)
Supplement: Supplementary file 4 — Additional file 4: Table S3. Common genes related to ARL3 in the CGGA, TCGA and REMBRANDT. [file 12967_2019_1914_MOESM4_ESM.xlsx]

## Sheet: Sheet1
516 common elements in "CGGA", "TCGA" and "REMBRANDT":
ARL3
CUEDC2
ZNF32
ASCC1
UROS
FNDC3B
CISD1
KHNYN
MYH9
PPP3CB
DCTN3
ATP5C1
PARD6A
CUTC
LAMC1
MRC2
TIAL1
SLC12A7
ACTR1A
CHSY1
IQGAP1
PTRF
ACTN1
FAM129A
LAMB1
SEC61A2
ADAMTS1
KLRC3
CAST
FBXL15
C1RL
RASL10A
MSRB2
TBPL1
FKBP9
RWDD2A
CAMLG
GLUD1
COL4A2
SP140L
ZNF248
RUNDC3A
FAM188A
TCEAL1
IDI1
MSN
RNF5
BHLHE40
LRRFIP1
CDH18
COL5A2
VPS26A
MXI1
RAB33A
SERPINH1
STEAP3
FLNA
ACTN4
ANKRD46
ZC3HAV1
C10orf88
COL5A1
EFEMP2
NECAP1
GUSB
GABARAPL2
THNSL1
EHD2
HSP90B1
SERPING1
DUSP26
MRPS28
TAGLN3
ASB13
BCL3
PRPSAP2
PYGL
SH3GL2
TIMP1
SNAP91
CEBPD
CREB3L2
PDIA3
KLHDC3
ZNF217
C1R
TMEM214
ABCC3
PDSS1
ABHD6
MYOF
TCIRG1
KIF2A
TNFAIP3
HSPA5
INA
PCSK5
RBM47
RPRD1A
CKAP4
MYO1E
PLAUR
RBMS1
FYCO1
SGSH
BBS10
CDHR1
ICAM1
TNFRSF1A
CAMK2G
FAM175B
RPN2
GALNT2
GHITM
ITGA5
COL4A1
KIAA1107
ANXA2
HSPG2
KLHDC2
POLR2F
TRIP6
SWAP70
TMEM183A
ATP1A3
ATP6V1G2
CRYL1
IFIT5
TRIP4
GDAP1L1
HDDC2
UXT
FSTL1
PDIA4
GPR162
MFSD1
CFLAR
CTSA
LGALS3BP
LPP
NMT2
SYP
BGN
GSTA4
HSF2
FAM149B1
PLXNB2
SLC9A1
TGFBI
FAM114A1
FZD5
SRPX2
PPA1
ADCY2
NAMPT
P4HB
AKAP6
FZD7
PLXND1
ADAM9
SP100
ATP2B2
RPP30
TNFAIP6
ZFP36
ANXA1
CYP2E1
YPEL1
ADM
CASP8
OSBPL3
PPP2R2D
WWTR1
KHDRBS2
RRBP1
TRIP10
KCND2
SNAI2
GRN
CA12
COX15
FAM46A
NDRG3
CD93
ZC4H2
DPYD
HEG1
TRIM38
TTC33
ARHGDIG
CDC42
IFITM3
MAP2K3
MKNK2
SEC31A
CSDC2
EMILIN1
SPATS2L
WIPI1
ARAP3
LDHA
LGALS3
LRP10
MRPL48
MVP
MAN2B1
NAP1L3
HIST3H2A
NUDT11
PFN2
IL17RA
RPS6KA3
SLC2A10
SYNPO
ACTL6B
LOXL1
RAB3A
PEX19
TMEFF1
ADAM12
CD248
HK2
TMEM151B
IL1RAPL1
SORCS3
TEAD3
APOBEC3C
FN1
TRADD
CXXC4
ELK3
KCNB1
SLC22A18
SLC25A4
CYR61
RPRM
C10orf76
C19orf66
CDC123
CLIC1
DRAM1
HRH1
IL4R
EMP3
FZD1
GNG4
KLHL23
CNKSR2
F3
SLC15A3
WDR5B
CLASP2
CFI
FUT4
PCOLCE
PLOD3
PSD
CASP4
CWF19L1
FLRT1
CUX2
IFI30
COL6A2
ETV6
FGF13
LIMS1
MAGEH1
SBNO2
FAIM2
ACSS3
TIMM23
ADD3
C11orf71
DNAJC12
DYNLT3
GRB10
LAMB2
MXRA5
CHI3L1
PAK3
RPP38
ATRNL1
MDH1
MLEC
NEAT1
RIMS2
SERPINE1
F11R
IGFBP2
NRXN1
PTCD3
CDH9
RALYL
SLITRK5
THBD
TMEM59L
TYMP
CNTN1
GYS1
IFITM2
ZNF821
EPHB1
FRS3
OSMR
PDE2A
INPP1
PID1
RIPK1
THRA
TSSC1
DNAJC3
GBP1
SEC61A1
AIM1
ARSJ
DNM3
FGF12
FMOD
GNS
NT5C2
SOD2
LIMK2
MAPK10
PPIC
CBLN1
KIAA1644
MYL12A
PLCB1
RAB11FIP2
BCL7A
P4HA2
SLC35E1
CD151
EAPP
LOX
THTPA
DGKI
EDEM1
NAGA
REEP4
OAT
SIRT1
SSTR2
TNFAIP2
ACP2
IMPDH1
PGAM1
ENDOG
TRPM4
WAC
ARMC1
B4GALT6
CD44
FSD1
CLNS1A
STAM
TPP1
ASCL1
GNAL
MAP3K6
SLC8A2
TNC
CDR2
EFNB2
HSPA12A
PKD2
TMED9
ARPC1B
FAM192A
PCGF2
CHPF2
CLEC5A
KCNN1
RAB27A
IGBP1
BEX1
CAMKV
CAMTA1
HSPB1
IGFBP3
DDB2
STAT5A
TAGLN2
ZNF529
CACYBP
KCNAB1
RAP2B
ZNF804A
C2orf27A
MYO1B
OMG
STC1
VASP
ALDOC
CUL7
CXorf57
MMP14
NID2
RIMS1
THBS1
MICALL2
ANKRD26
CDK5R1
CDR1
CHD5
DDRGK1
GREB1L
ENPEP
C5AR1
NOTCH3
SIRT4
TRIM37
ADO
ELAVL4
PODXL2
SHOC2
CTSD
TMLHE
PLSCR1
PTGER4
SNCB
INPP5A
PLOD1
ANXA7
C1S
CD2AP
DIP2C
FAM69A
MYT1
REPS2
RPS6KA5
S100A11
CYTIP
FDFT1
GABRG2
MLLT11
PIGB
PLP2
ANXA5
ATP10D
BACE2
FKBP10
GNAO1
KIN
NRP1
PDIA5
TOX3
C5orf30
CDH20
DPY19L1
SEMA4G
DCTN6
FCHSD2
JPH3
CSTF2T
DCTD
DUSP6
GABRA3
MGAT1
MYO1F
DPP4
NOD1
RNASE4
ATP5S
GALNS
IL13RA1
SLC11A1
SPTBN2
SUSD5
WDR1
ECE1
SEL1L3
CPPED1
DLL3
TMBIM1
DDX25
LAMA2
MAPK8IP2
MEOX2
PDGFRB
TDRKH
TSC22D1
CDKN1B
SLC2A3
AJAP1
ALCAM
PRKCH
SCG3
VAMP2
ZMYND11
CELF3
GABBR1
SLC35D1
TNFRSF1B
FAM13C
HEXB
LHFPL2
DOCK3
IRF1
NNMT
NT5M
OPCML
SLC25A28
BSN
CACNG2
TAGLN
CD200
CUL2
EVC
KCNE4
SLC25A24
SUPV3L1
TSPAN4
WASF1
BST2
SCN3A
